# Supplementary material for: A near-infrared water-soluble fluorescent probe for the detection of biothiols in living cells and Escherichia coli
Source: Royal Society of Chemistry journal article supplement (doi:10.1039/c8ay02505c), 2018-12-26
Supplement: c8ay02505c1.pdf [file c8ay02505c1.pdf]

## *Supporting Information*

### A Near-Infrared Water-Soluble Fluorescent Probe for the Detection of Biothiols in Living Cells and Escherichia Coli

Ling-Ling Li, Pei-Yang He, Sheng-Lin Pan, Lei Shi, Meng-Yang Li, Qian Zhou, Hong Zhang, Nan Wang, Kun Li\*, Xiao-Qi Yu\*

*Key Laboratory of Green Chemistry and Technology, Ministry of Education, College of Chemistry, Sichuan University, No. 29, Wangjiang Road, Chengdu, 610064, P.R. China.*

*\*Correspondence and requests for materials should be addressed to Kun- Li ([kli@scu.edu.cn](mailto:kli@scu.edu.cn)) or Xiao-Qi Yu ([xqyu@scu.edu.cn](mailto:xqyu@scu.edu.cn))*

#### Contents

|                                                                                                                                         |            |
|-----------------------------------------------------------------------------------------------------------------------------------------|------------|
| <b>1. Synthesis of Compounds</b>                                                                                                        | <b>S2</b>  |
| <b>2. Molar Extinction Coefficient</b>                                                                                                  | <b>S3</b>  |
| <b>3. UV spectra</b>                                                                                                                    | <b>S3</b>  |
| <b>4. Time-dependent fluorescence changes of HXPIS with biothiols</b>                                                                   | <b>S4</b>  |
| <b>5. Fluorometric titration experiment</b>                                                                                             | <b>S5</b>  |
| <b>6. Limit of detection</b>                                                                                                            | <b>S5</b>  |
| <b>7. pH influence</b>                                                                                                                  | <b>S7</b>  |
| <b>8. Selectivity of the probe HXPIS towards biothiols</b>                                                                              | <b>S7</b>  |
| <b>9. Determination of the cleavage product through <sup>1</sup>H-NMR and HRMS tests</b>                                                | <b>S9</b>  |
| <b>10. Cytotoxicity experiments</b>                                                                                                     | <b>S9</b>  |
| <b>11. Table S1. Summary of the optical properties of representative near infrared fluorescent probes for distinguishing biothiols.</b> | <b>S9</b>  |
| <b>12. NMR and HRMS spectra of HXPIS</b>                                                                                                | <b>S13</b> |

#### 1. Synthesis of Compounds

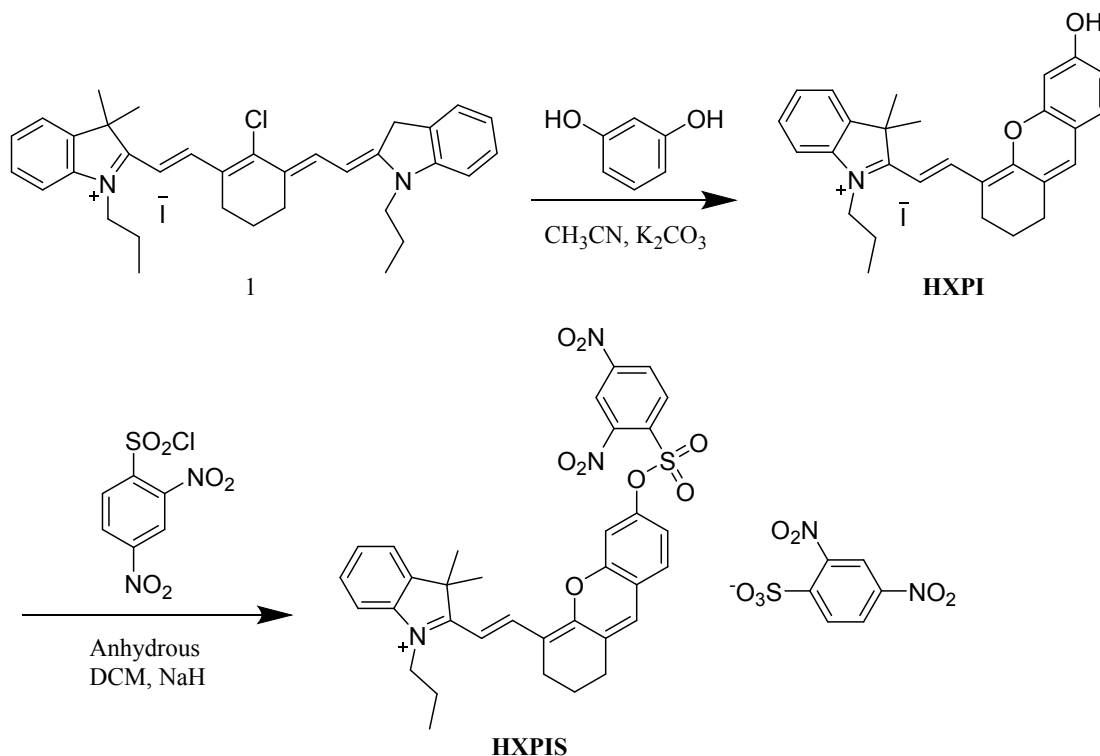

**Scheme S1.** Synthetic route of **HXPIS**.

Compound 1 and HXPI were prepared referring to the literature reports.<sup>1-2</sup>

**HXPIS:** To a solution of HXPI (500.0 mg, 0.93 mmol) in dry  $\text{CH}_2\text{Cl}_2$  (10 mL), NaH (110 mg, 2.79 mmol) was added. The mixture was stirred at room temperature for 30 min. Then 2,4-dinitrobenzenesulfonyl chloride (740 mg, 2.79 mmol) was diluted in 10 mL  $\text{CH}_2\text{Cl}_2$  and added dropwise to the solution. The mixture was stirred at room temperature for another 5 hours. The color of the reaction changed from deep blue to purple. The solvent was removed under reduced pressure and the crude product was purified by column chromatography over silica gel eluting with  $\text{CH}_2\text{Cl}_2/\text{CH}_3\text{OH} = 80:1$  to afford purple solid (463 mg, yield 56.0%).  $^1\text{H-NMR}$  (400 MHz,  $\text{DMSO-d}_6$ ) 0.93–0.97 (t,  $J_1=8.0$  Hz,  $J_2=8.0$  Hz, 3H), 1.71(s, 6H), 1.79–1.85 (m, 4H), 2.64–2.67 (m, 4H), 4.43–4.46 (t,  $J_1=8.0$  Hz,  $J_2=4.0$  Hz, 2H), 6.69–6.73 (d,  $J=16.0$ , 1H), 6.99–7.02 (d,  $J=12.0$  Hz, 1H), 7.30 (s, 1H), 7.50–7.57 (m, 3H), 7.42 (s, 1H), 7.76–7.79 (t,  $J_1=4.0$  Hz,  $J_2=8.0$  Hz, 2H), 8.04–8.06 (d,  $J=8.0$  Hz, 1H), 8.33–8.37 (m, 2H), 8.48–8.51 (m, 2H), 8.60–8.63 (d,  $J = 8.0$  Hz, 1H),  $\delta$  9.14 (s, 1H).  $^{13}\text{C-NMR}$  (101 MHz,  $\text{DMSO-d}_6$ )  $\delta$  11.4, 20.1, 21.7, 23.9, 27.5, 29.1, 47.1, 51.5, 107.8, 110.6, 114.6, 115.1, 118.7, 121.6, 121.9, 123.2, 126.1, 128.0, 128.5, 129.4, 129.5, 131.1, 131.2, 131.5, 134.2, 141.7, 143.1, 145.1, 145.9, 147.8, 148.6, 149.6, 152.0, 152.9, 158.2, 174.3, 179.7. HRMS (ESI)  $m/z$  calcd. for  $\text{C}_{34}\text{H}_{32}\text{N}_3\text{O}_8\text{S}^+$  ( $\text{M}^+$ ): 642.1905. Found: 642.1903.

## 2. Molar Extinction Coefficient

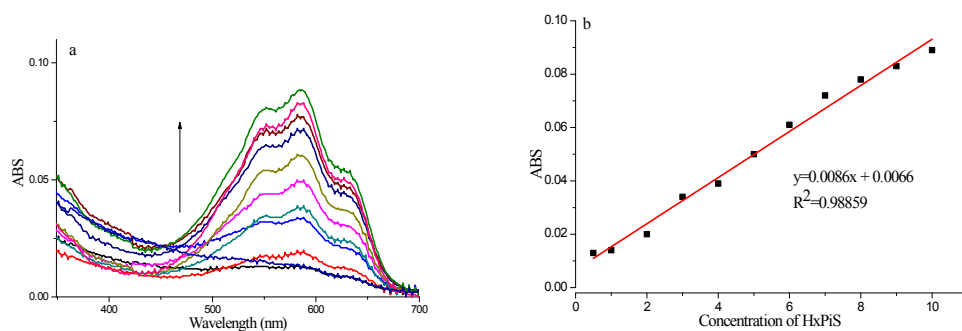

**Figure S1.** (a) UV spectra of HXPIS at different concentrations (0.5, 1, 2, 3, 4, 5, 6, 7, 8, 9, 10 μM) (b) Absorption-concentration curve of HXPIS.

### 3. UV spectra

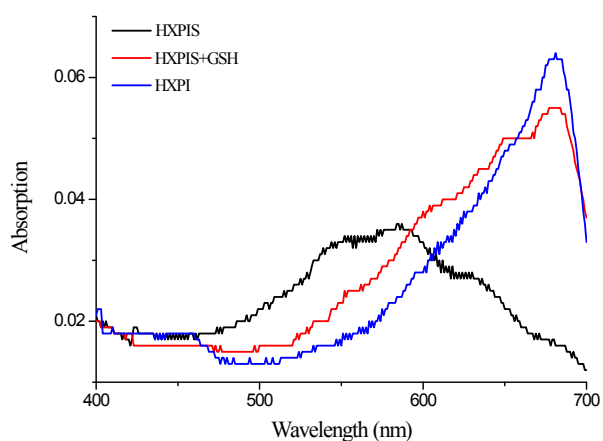

**Figure S2.** Absorption spectra of HXPIS (5 μM), HXPIS (5 μM) with GSH (100 μM), and HXPI (5 μM) in PBS buffer solution (10 mM, pH 7.4).

### 4. Time-dependent fluorescence changes of HXPIS with biothiols.

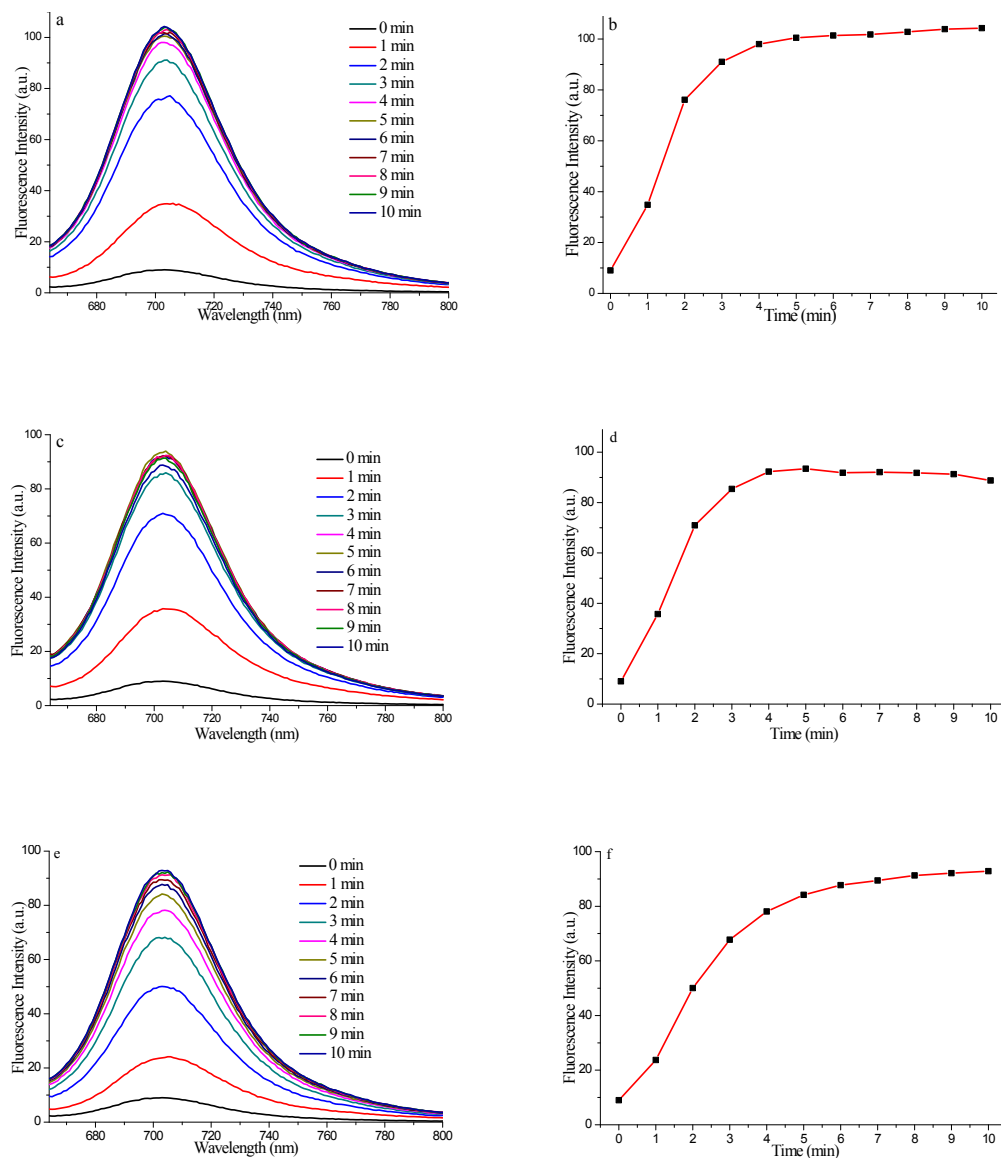

**Figure S3.** Time-dependent fluorescence changes of HXPIS (5 μM) to (a) GSH, (b) Cys and (c) Hcy; Fluorescence intensity changes at 703 nm of HXPIS with (d) GSH, (e) Cys and (f) Hcy at different indicated time.

## 5. Fluorometric titration experiment

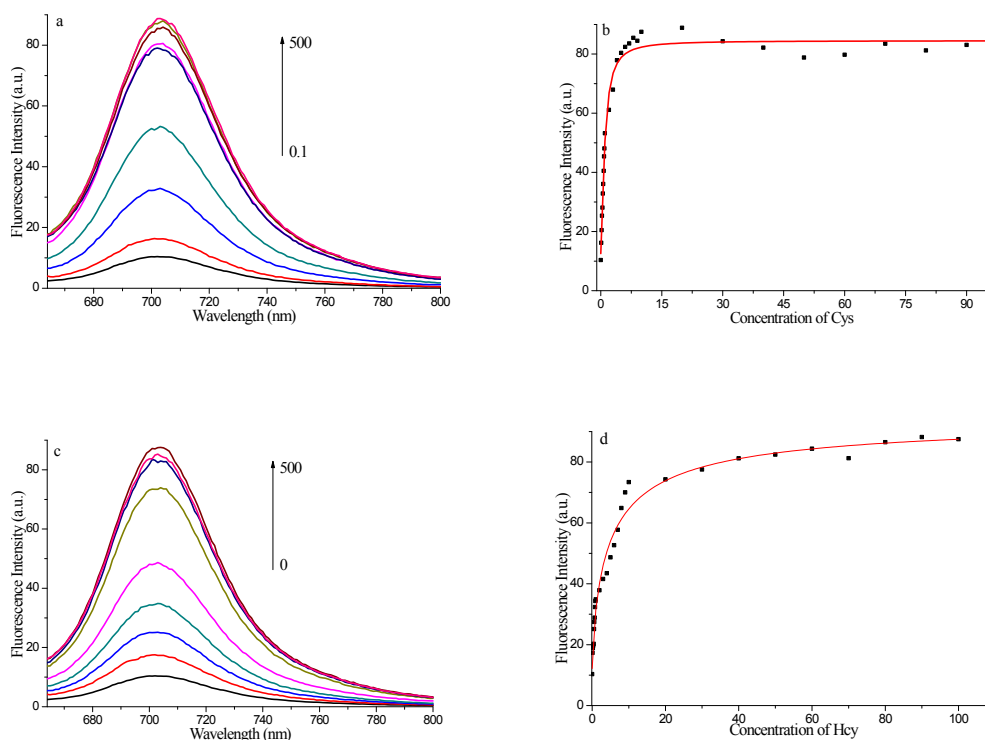

**Figure S4.** Fluorescence changes of HXPIS (5 μM) on the incremental addition of (a) Cys, (c) Hcy; The tendency chart of the fluorescence intensity of HXPIS with the increased concentration of (b) Cys, (d) Hcy.

## 6. Limit of detection

The limit of detection, expressed as the concentration,  $CL$ ,  $CL = 3\sigma/m$

$$\sigma = \sqrt{\frac{\sum(\bar{x} - x_i)^2}{n - 1}}$$

$\bar{x}$  is the mean of the blank measures (probe only),  $x_i$  is the values of blank measures,  $n$  is the tested number of blank measures,  $m$  is the slope of the linear regression equation.

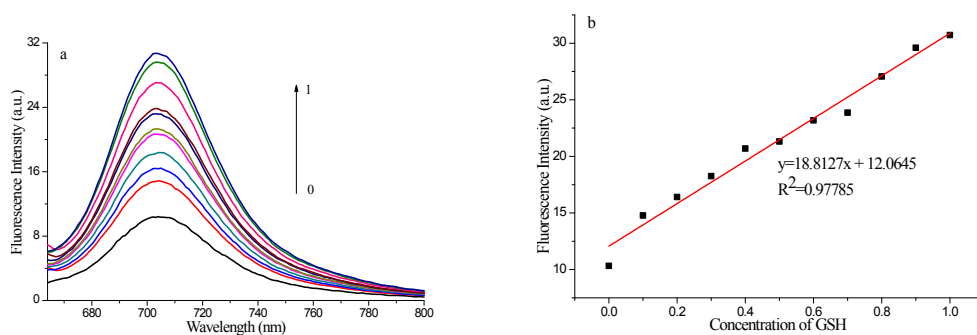

**Figure S5.** (a) The fluorescence response of the probe HXPIS to GSH at the varied concentrations (0-1 μM). (b) A linear correlation between fluorescent response and concentration of GSH. The

spectra were recorded in PBS buffer (pH 7.4, 10 mM).  $\lambda_{\text{ex/em}} = 654/703$  nm.

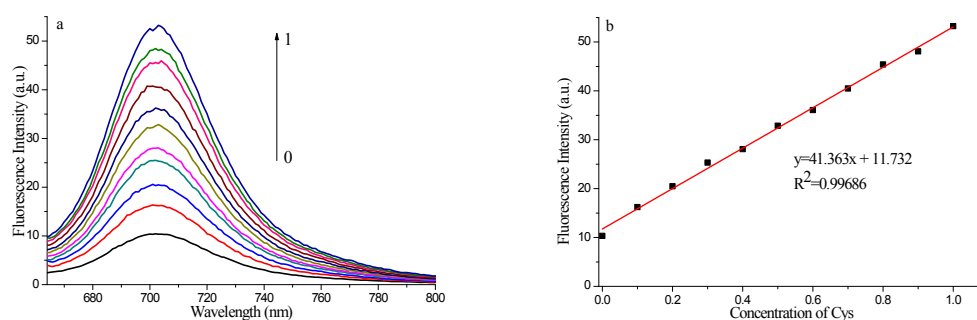

**Figure S6.** (a) The fluorescence response of the probe HXPIS to Cys at the varied concentrations (0-1  $\mu\text{M}$ ). (b) A linear correlation between fluorescent response and concentration of Cys. The spectra were recorded in PBS buffer (pH 7.4, 10 mM).  $\lambda_{\text{ex/em}} = 654/703$  nm.

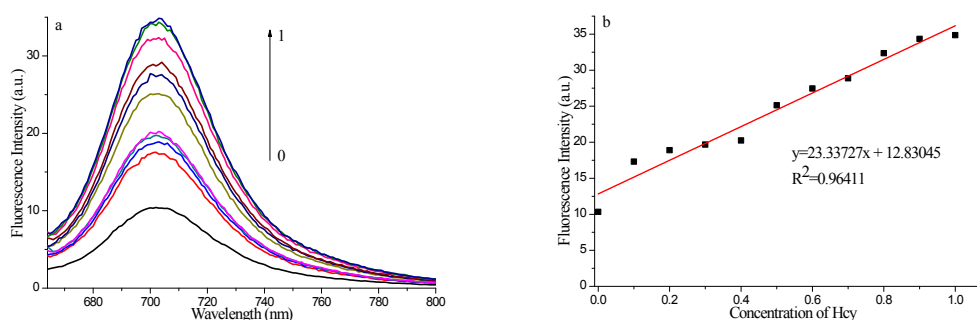

**Figure S7.** (a) The fluorescence response of the probe HXPIS to Hcy at the varied concentrations (0-1  $\mu\text{M}$ ). (b) A linear correlation between fluorescent response and concentration of Hcy. The spectra were recorded in PBS buffer (pH 7.4, 10 mM).  $\lambda_{\text{ex/em}} = 654/703$  nm.

## 7. pH influence

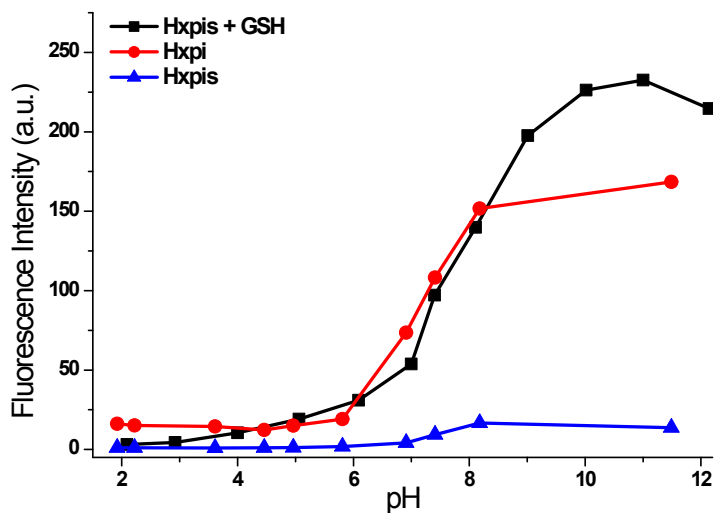

**Figure S8.** Effects of pH on the fluorescence of HXPIS (5  $\mu$ M) + GSH (100  $\mu$ M), HXPI (5  $\mu$ M) and HXPIS (5  $\mu$ M). Conditions: 10 mM PBS, pH 7.4.  $\lambda_{ex}/\lambda_{em}$ =654 /703 nm.

### 8. Selectivity of the probe HXPIS towards biothiols.

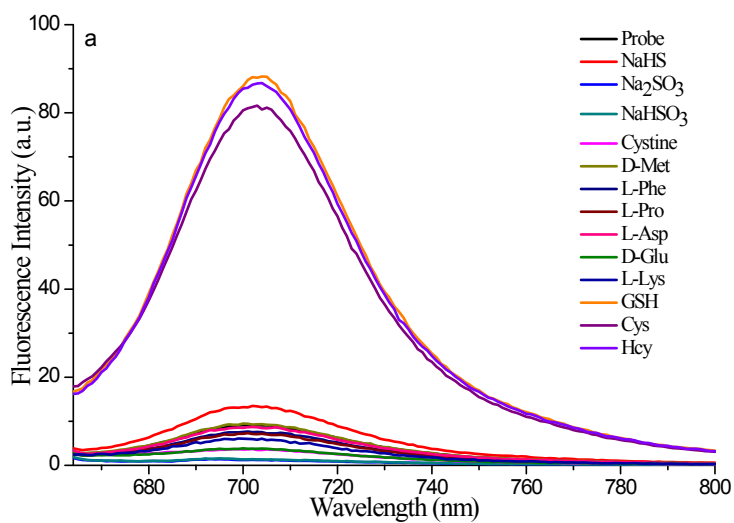

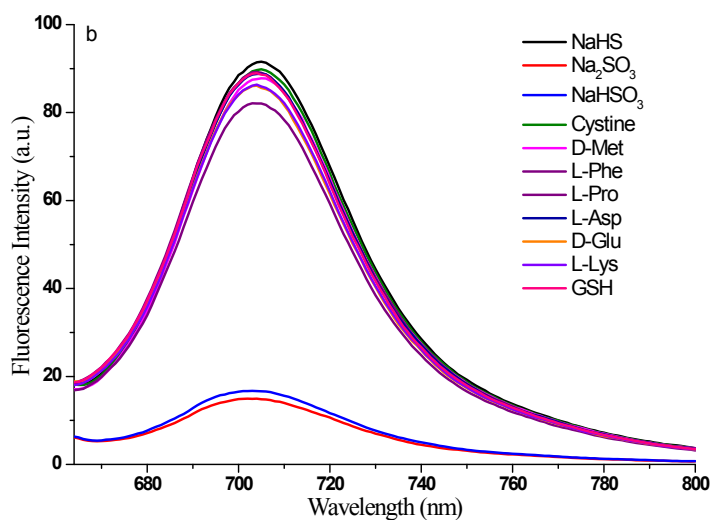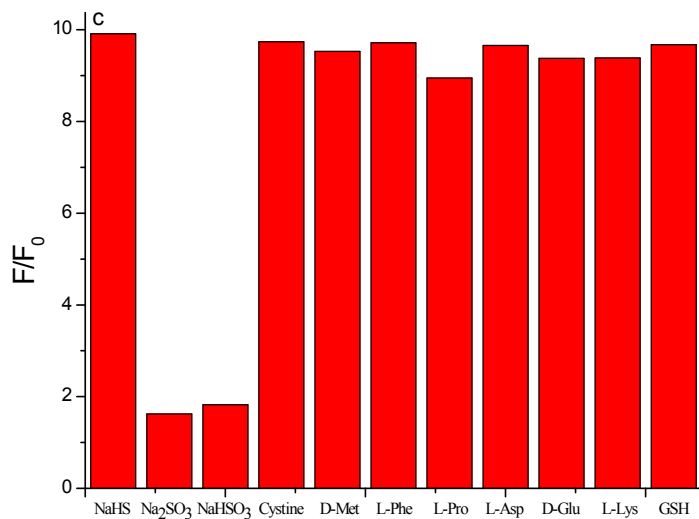

**Figure S9.** (a) The fluorescence spectra of the probe HXPIS (5  $\mu\text{M}$ ) in the presence of various relevant analytes (20 equiv. of NaHS, Na<sub>2</sub>SO<sub>3</sub>, NaHSO<sub>3</sub>, Cystine, D-Met, L-Phe, L-Pro, L-Asp, D-Glu, L-Lys, Cys, Hcy and GSH). (b) The fluorescence spectra of HxpiS (5  $\mu\text{M}$ ) upon the addition of different interferents (NaHS, Na<sub>2</sub>SO<sub>3</sub>, NaHSO<sub>3</sub>, Cystine, D-Met, L-Phe, L-Pro, L-Asp, D-Glu, L-Lys, 100  $\mu\text{M}$ ) in the presence of GSH (100  $\mu\text{M}$ ) in PBS (pH = 7.4,  $\lambda_{\text{ex}}/\lambda_{\text{em}}$  = 654 / 703 nm). (c) The histogram of (b). The data were obtained after the incubation of the probe HXPIS with the analytes at 37  $^{\circ}\text{C}$  for 30 min.



## 9. Determination of the cleavage product through HRMS test.

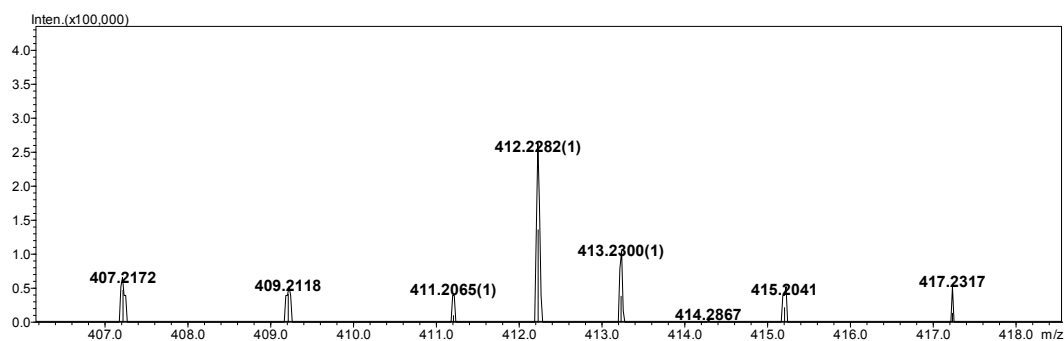

**Figure S10.** HRMS result of the reaction product of HXPIS with GSH.

## 10. Cytotoxicity experiments

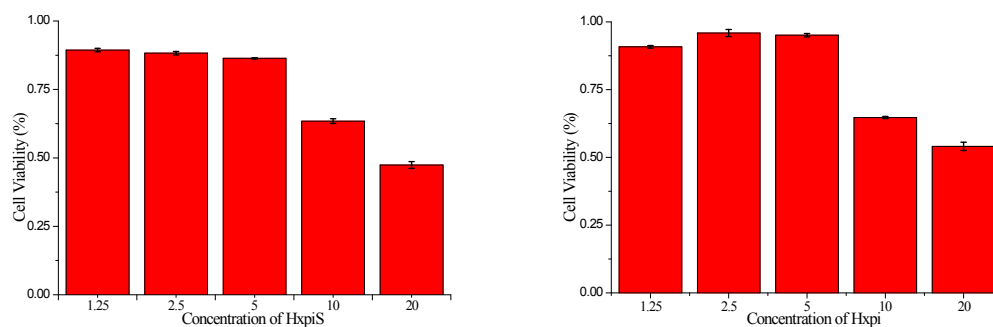

**Figure S11.** Cytotoxicity of different concentrations of HXPIS and HXPI to Hela cells by a standard MTS assay, the experiment was repeated three times and the data are shown as mean ( $\pm$ S.D.).

## 11. Table S1. Summary of the optical properties of representative near infrared fluorescent probes for distinguishing biothiols.

| NIR probe | $\lambda_{ex}/\lambda_{em}$ (nm) | Solubility                        | References                            |
|-----------|----------------------------------|-----------------------------------|---------------------------------------|
|           | 600/ 737                         | EtOH/PBS<br>(v/v, 1: 1, pH = 7.4) | J. Mater. Chem. B, 2018, 6, 1791-1798 |

|                                                                                     |                   |                                    |                                            |
|-------------------------------------------------------------------------------------|-------------------|------------------------------------|--------------------------------------------|
| 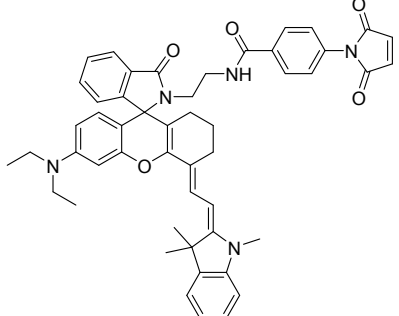   | 600/ 746          | EtOH/PBS<br>(v/v, 3: 2, pH = 7.4). | J. Mater. Chem. B, 2018, 6, 7486-7494      |
|   | 470/540 & 600/670 | THF/PBS (v/v, 1: 1, pH = 7.4)      | Analyst, 2018, 143, 5218-5224              |
|  | 646/ 661          | THF/PBS (v/v, 1: 1, pH = 7.4)      | Dyes and Pigments, 2018, 152, 85-92        |
|  | 620/ 688          | DMSO/PBS (v/v, 1: 1, pH = 7.4)     | Sensor and Actuators B, 2017, 246, 988-993 |

|                                                                                     |           |                                                 |                                              |
|-------------------------------------------------------------------------------------|-----------|-------------------------------------------------|----------------------------------------------|
| 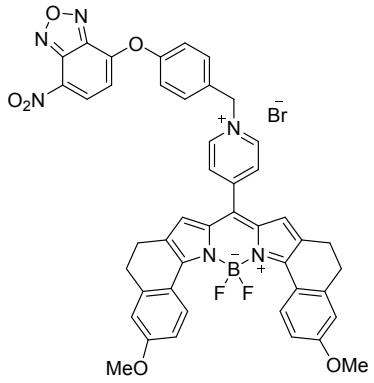   | 620 / 685 | DMSO/PBS<br>(v/v, 1: 1, pH = 7.4)               | Sensor and Actuators B, 2018, 257, 1076-1082 |
|    | 560/ 690  | DMSO/H <sub>2</sub> O<br>(v/v, 1: 1, pH = 7.4)  | Chem. Commun., 2014, 50, 1751-1753           |
|   | 530 / 650 | DMSO/PBS<br>(v/v, 1: 1, pH = 7.4)               | Chem. Sci., 2016, 7, 4958-4965               |
|  | 575/ 655  | CH <sub>3</sub> CN/HEPES<br>(v/v, 1: 1, pH = 9) | RSC Adv., 2015, 5, 28713-28716               |
|  | 650 / 748 | DMSO/HEPES<br>(v/v, 1: 1, pH = 7.4)             | RSC Adv., 2014, 4, 8360-8364                 |

|                                                                                                                                                                                                                                                                                                                                                                                                                                                           |           |                                |                                         |
|-----------------------------------------------------------------------------------------------------------------------------------------------------------------------------------------------------------------------------------------------------------------------------------------------------------------------------------------------------------------------------------------------------------------------------------------------------------|-----------|--------------------------------|-----------------------------------------|
| 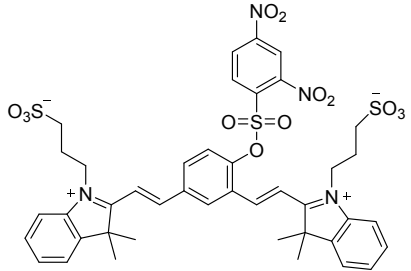 <p>Chemical structure of a bis-imine dye. It features two indole-like rings connected by a central chain. Each ring has a methyl group and a sulfonate group (-SO<sub>3</sub><sup>-</sup>). The central chain includes a sulfonate group (-SO<sub>3</sub><sup>-</sup>) and a nitro group (-NO<sub>2</sub>).</p>                                                         | 600/ 698  | PBS, pH=7.4                    | Org. Biomol. Chem., 2013, 11, 2098-     |
|  <p>Chemical structure of a bis-imine dye. It features two indole-like rings connected by a central chain. One ring has a methyl group and a nitro group (-NO<sub>2</sub>). The central chain includes a chlorine atom (-Cl) and a sulfonate group (-SO<sub>3</sub><sup>-</sup>).</p>                                                                                    | 550 / 680 | DMSO/PBS (v/v, 1: 1, pH = 7.4) | Chem. Sci. 2016, 7, 1896-1903           |
|  <p>Chemical structure of a bis-imine dye. It features two indole-like rings connected by a central chain. The central chain includes a boron atom (B) coordinated to two fluorine atoms (F) and a phenyl group (-C<sub>6</sub>H<sub>5</sub>). The central chain also includes a sulfonate group (-SO<sub>3</sub><sup>-</sup>) and a nitro group (-NO<sub>2</sub>).</p> | 600/ 661  | PBS, pH=7.4                    | Chem. Nano. Mat., 2016, 2, 396-399      |
|  <p>Chemical structure of a bis-imine dye. It features two indole-like rings connected by a central chain. Each ring has a methyl group and a butyrate group (-CO<sub>2</sub><sup>n</sup>Bu). The central chain includes a diazo group (-N=N-) and a nitro group (-NO<sub>2</sub>).</p>                                                                                | 600 / 810 | HEPES, pH=7.4                  | J. Am. Chem. Soc., 2014, 136, 7018-7025 |

|                                                                                   |           |             |           |
|-----------------------------------------------------------------------------------|-----------|-------------|-----------|
| 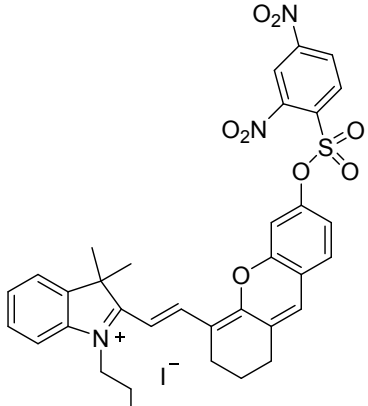 | 681 / 703 | PBS, pH=7.4 | This Work |
|-----------------------------------------------------------------------------------|-----------|-------------|-----------|

## 12. NMR and HRMS spectra of HXPIS

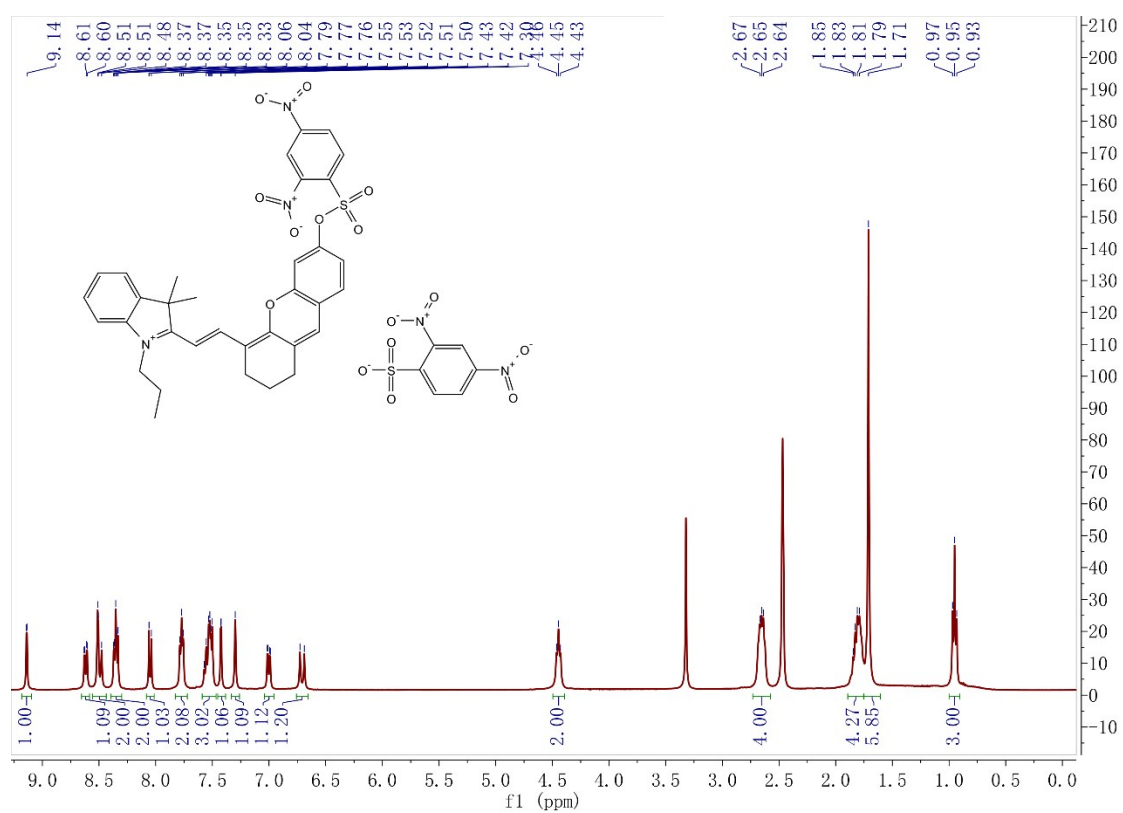

**Figure S12.**  $^1\text{H-NMR}$  spectrum of HXPIS in  $\text{DMSO-d}_6$ .

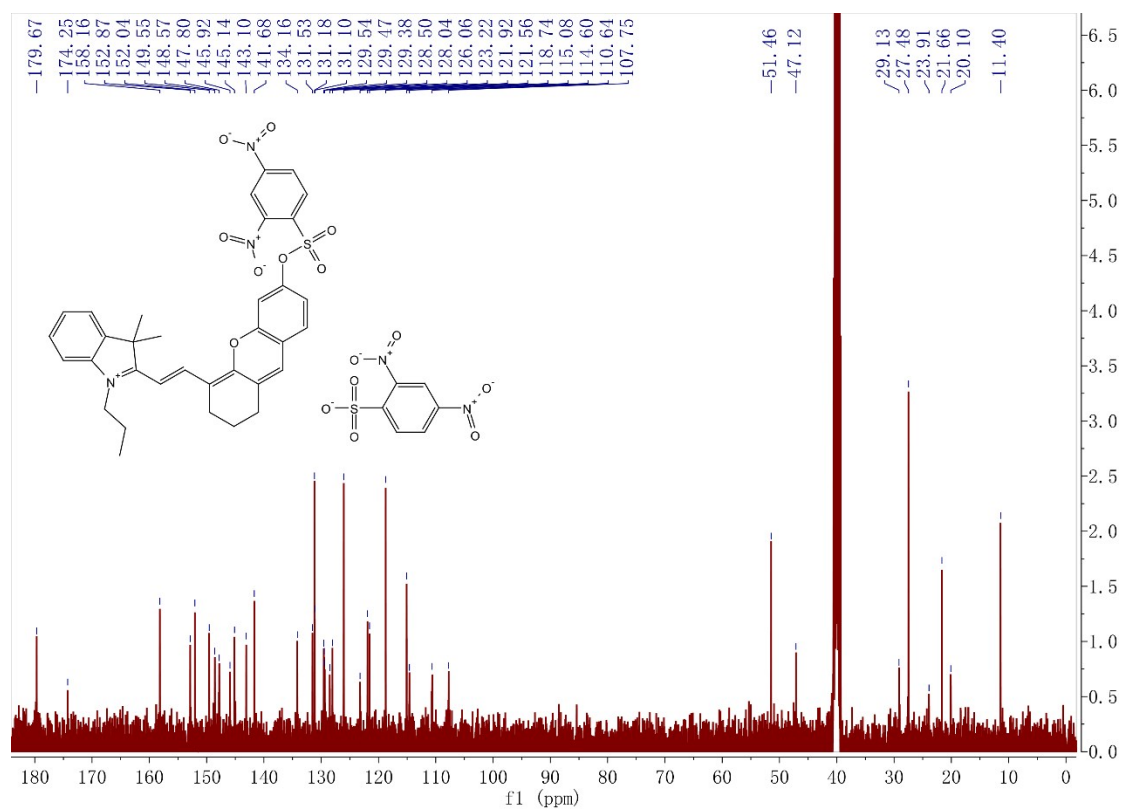

**Figure S13.**  $^{13}\text{C}$ -NMR spectrum of HXPIS in  $\text{DMSO-d}_6$ .

MS(E+)

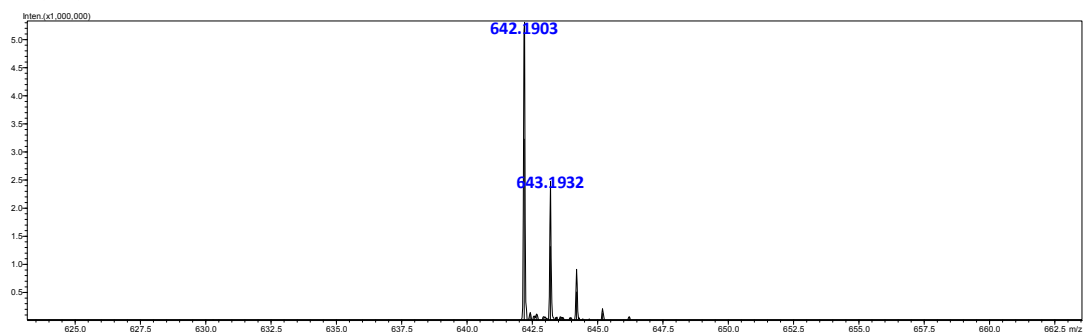

**Figure S14.** HRMS result of HXPIS.

## Reference

- [1] L. Yuan, W.Y. Lin, S. Zhao, et al., *J. Am. Chem. Soc.* 134 (2012) 13510–13523.
- [2] X.F. Wu, L.H. Li, W. Shi, Q.Y. Gong, H.M. Ma, *Angew. Chem. Int. Ed.* 55 (2016) 14728–14732.
